# Supplementary material
Source: PubMed Central journal article supplement (PMC8480151)

**Note to readers with disabilities:** *EHP* strives to ensure that all journal content is accessible to all readers. However, some figures and Supplemental Material published in *EHP* articles may not conform to [508 standards](#) due to the complexity of the information being presented. If you need assistance accessing journal content, please contact [ehp508@niehs.nih.gov](mailto:ehp508@niehs.nih.gov). Our staff will work with you to assess and meet your accessibility needs within 3 working days.

### **Supplemental Material**

#### **Associations of Maternal Serum Perfluoroalkyl Substances Concentrations with Early Adolescent Bone Mineral Content and Density: The Health Outcomes and Measures of the Environment (HOME) Study**

Jessie P. Buckley, Jordan R. Kuiper, Bruce P. Lanphear, Antonia M. Calafat, Kim M. Cecil, Aimin Chen, Yingying Xu, Kimberly Yolton, Heidi J. Kalkwarf, and Joseph M. Braun

#### **Table of Contents**

**Table S1.** Maternal serum perfluoroalkyl substances concentrations (ng/mL) ( $n = 206$ ): The HOME Study, 2003-2006.

**Table S2.** Spearman's rank order correlation coefficients of maternal serum perfluoroalkyl substance concentrations ( $n = 206$ ): The HOME Study.

**Table S3.** Adjusted associations of maternal serum perfluoroalkyl substances concentrations with bone outcome Z-scores at 12 years of age ( $n = 206$ ): The HOME Study.

**Table S4.** Adjusted associations of maternal serum perfluoroalkyl substances concentrations with bone outcome Z-scores at age 12 years among males ( $n = 93$ ) and females ( $n = 113$ ): The HOME Study.

**Table S5.** Unadjusted associations of maternal serum perfluoroalkyl substances concentrations with bone outcome Z-scores at age 12 years, overall and by child sex ( $n = 206$ ): The HOME Study.

**Table S6.** Adjusted associations of the maternal serum perfluoroalkyl substances mixture with bone outcome Z-scores at age 12 years estimated using quantile g-computation, overall and by child sex ( $n = 206$ ): The HOME Study.

**Table S7.** Adjusted differences (95% credible intervals) in bone outcome Z-scores at age 12 years for percentiles of the maternal serum perfluoroalkyl substances mixture compared to the 50<sup>th</sup> percentile estimated using Bayesian kernel machine regression, overall and by child sex ( $n = 206$ ): The HOME Study.

**Table S8.** Posterior inclusion probabilities estimated in Bayesian kernel machine regression models of adjusted associations of maternal serum perfluoroalkyl substances concentrations with bone outcome Z-scores at age 12 years, overall and by child sex ( $n = 206$ ): The HOME Study.

**Table S9.** Adjusted estimates of natural indirect (lean body mass index mediated) and natural direct effects of maternal serum perfluoroalkyl substances concentrations on BMD Z-scores at age 12 years, overall ( $n = 206$ ): The HOME Study.

**Table S10.** Adjusted estimates of natural indirect (lean body mass index mediated) and natural direct effects of maternal serum perfluoroalkyl substances concentrations on BMD Z-scores at age 12 years, males ( $n = 93$ ): The HOME Study.

**Table S11.** Adjusted estimates of natural indirect (lean body mass index mediated) and natural direct effects of maternal serum perfluoroalkyl substances concentrations on BMD Z-scores at age 12 years, females ( $n = 113$ ): The HOME Study.

**Table S12.** Adjusted estimates of empirical mean (95% credible interval) natural indirect effects and natural direct effects from Bayesian kernel machine regression causal mediation analysis models of the maternal serum perfluoroalkyl substances mixture with bone outcome Z-scores at age 12 years, overall and by child sex ( $n = 206$ ): The HOME Study.

**Table S13.** Adjusted associations of maternal serum perfluoroalkyl substances concentrations with bone outcome Z-scores at 12 years of age ( $n = 206$ ): The HOME Study. Sensitivity analysis with additional adjustment for Tanner stage at age 12 years.

**Table S14.** Adjusted associations of maternal serum perfluoroalkyl substance concentrations with bone outcome Z-scores at 12 years of age among males ( $n = 93$ ) and females ( $n = 113$ ): The HOME Study. Sensitivity analysis with additional adjustment for Tanner stage at age 12 years.

**Figure S1.** HOME Study eligibility and enrollment flowchart for study inclusion.

**Figure S2.** Directed acyclic graph for the relationship of maternal serum PFAS concentrations with child bone outcomes at age 12 years: The HOME Study.

Table S1. Maternal serum perfluoroalkyl substances concentrations (ng/mL) (*n* = 206): The HOME Study, 2003-2006

| PFAS  | Limit of detection (LOD) | % Detected | Minimum | 25 <sup>th</sup> Percentile | Median | 75 <sup>th</sup> Percentile | Maximum |
|-------|--------------------------|------------|---------|-----------------------------|--------|-----------------------------|---------|
| PFOA  | 0.1                      | 100        | 0.5     | 3.7                         | 5.2    | 7.2                         | 17.4    |
| PFNA  | 0.082                    | 100        | 0.1     | 0.7                         | 0.9    | 1.2                         | 2.9     |
| PFHxS | 0.1                      | 99         | < LOD   | 0.8                         | 1.3    | 2.3                         | 32.5    |
| PFOS  | 0.2                      | 100        | 0.4     | 8.8                         | 12.9   | 18                          | 57.2    |

Note. PFAS, per- and polyfluoroalkyl substances; PFOA, perfluorooctanoic acid; PFNA, perfluorononanoic acid; PFHxS, perfluorohexane sulfonic acid; PFOS, perfluorooctane sulfonic acid.

Table S2. Spearman's rank order correlation coefficients of maternal serum perfluoroalkyl substance concentrations ( $n = 206$ ): The HOME Study

|       | PFOA | PFNA | PFHxS | PFOS |
|-------|------|------|-------|------|
| PFOA  | 1    |      |       |      |
| PFNA  | 0.48 | 1    |       |      |
| PFHxS | 0.48 | 0.32 | 1     |      |
| PFOS  | 0.60 | 0.53 | 0.61  | 1    |

PFOA, perfluorooctanoic acid; PFNA, perfluorononanoic acid; PFHxS, perfluorohexane sulfonic acid; PFOS, perfluorooctane sulfonic acid.

Table S3. Adjusted associations of maternal serum perfluoroalkyl substances concentrations with bone outcome Z-scores at 12 years of age ( $n = 206$ ): The HOME Study

| Outcome                   | PFOA                | PFNA                 | PFHxS               | PFOS                |
|---------------------------|---------------------|----------------------|---------------------|---------------------|
| <b>BMC Z-score</b>        |                     |                      |                     |                     |
| Whole-body less head      | -0.06 (-0.19, 0.08) | -0.07 (-0.23, 0.08)  | 0.01 (-0.09, 0.11)  | -0.02 (-0.14, 0.10) |
| Total hip                 | -0.16 (-0.32, 0.00) | -0.18 (-0.36, -0.01) | -0.04 (-0.15, 0.08) | -0.07 (-0.20, 0.06) |
| Femoral neck              | -0.05 (-0.22, 0.12) | -0.05 (-0.24, 0.14)  | 0.02 (-0.10, 0.15)  | 0.01 (-0.14, 0.15)  |
| Forearm                   | -0.17 (-0.35, 0.01) | -0.24 (-0.44, -0.05) | -0.02 (-0.13, 0.10) | -0.07 (-0.22, 0.08) |
| Spine                     | -0.09 (-0.24, 0.05) | -0.11 (-0.29, 0.07)  | -0.02 (-0.12, 0.08) | -0.04 (-0.17, 0.09) |
| <b>BMD Z-score</b>        |                     |                      |                     |                     |
| Whole-body less head aBMD | -0.08 (-0.24, 0.07) | -0.12 (-0.30, 0.07)  | 0.00 (-0.11, 0.10)  | -0.01 (-0.14, 0.12) |
| Total hip aBMD            | -0.12 (-0.29, 0.06) | -0.06 (-0.29, 0.17)  | -0.03 (-0.17, 0.11) | -0.01 (-0.17, 0.15) |
| Femoral neck aBMD         | -0.01 (-0.19, 0.18) | 0.13 (-0.10, 0.36)   | 0.04 (-0.09, 0.18)  | 0.05 (-0.13, 0.22)  |
| Forearm aBMD              | -0.16 (-0.33, 0.00) | -0.13 (-0.33, 0.08)  | -0.09 (-0.20, 0.02) | -0.08 (-0.22, 0.05) |
| Ultradistal forearm aBMD  | -0.02 (-0.24, 0.20) | 0.04 (-0.22, 0.30)   | -0.01 (-0.16, 0.15) | -0.09 (-0.29, 0.12) |
| Spine BMAD                | -0.08 (-0.25, 0.09) | -0.05 (-0.25, 0.15)  | -0.11 (-0.25, 0.02) | -0.01 (-0.16, 0.13) |

Note: Difference (95% confidence interval) in bone outcome Z-score per  $\log_2$  unit increase in perfluoroalkyl substance concentrations estimated in separate linear regression models adjusted for maternal age at delivery, mid-pregnancy BMI, race/ethnicity, household income, parity, prenatal vitamin use, average blood lead concentration, child sex, child age at follow-up, child sex \* child age at follow-up. Missing covariate information accounted for using full-information maximum likelihood. BMC, bone mineral content; aBMD, areal bone mineral density; BMAD, bone mineral apparent density; PFOA, perfluorooctanoic acid; PFNA, perfluorononanoic acid; PFHxS, perfluorohexane sulfonic acid; PFOS, perfluorooctane sulfonic acid.

Table S4. Adjusted associations of maternal serum perfluoroalkyl substances concentrations with bone outcome Z-scores at age 12 years among males ( $n = 93$ ) and females ( $n = 113$ ): The HOME Study

| Outcome                   | PFOA                | PFNA                 | PFHxS               | PFOS                |
|---------------------------|---------------------|----------------------|---------------------|---------------------|
| Whole-body less head BMC  |                     |                      |                     |                     |
| Males                     | -0.13 (-0.34, 0.09) | -0.05 (-0.34, 0.24)  | 0.11 (-0.03, 0.24)  | 0.06 (-0.11, 0.24)  |
| Females                   | 0.04 (-0.13, 0.21)  | -0.05 (-0.23, 0.14)  | -0.04 (-0.16, 0.08) | -0.05 (-0.22, 0.12) |
| EMM p-value <sup>a</sup>  | 0.23                | 0.98                 | 0.11                | 0.37                |
| Total hip BMC             |                     |                      |                     |                     |
| Males                     | -0.24 (-0.49, 0.01) | -0.20 (-0.56, 0.17)  | 0.08 (-0.09, 0.25)  | -0.03 (-0.24, 0.19) |
| Females                   | -0.11 (-0.31, 0.09) | -0.16 (-0.35, 0.04)  | -0.12 (-0.25, 0.01) | -0.14 (-0.29, 0.02) |
| EMM p-value <sup>a</sup>  | 0.44                | 0.85                 | 0.07                | 0.41                |
| Femoral neck BMC          |                     |                      |                     |                     |
| Males                     | -0.14 (-0.41, 0.14) | -0.01 (-0.37, 0.36)  | 0.08 (-0.11, 0.26)  | 0.03 (-0.20, 0.27)  |
| Females                   | 0.02 (-0.20, 0.24)  | -0.04 (-0.27, 0.18)  | -0.02 (-0.16, 0.12) | -0.02 (-0.20, 0.16) |
| EMM p-value <sup>a</sup>  | 0.37                | 0.86                 | 0.4                 | 0.71                |
| Forearm BMC               |                     |                      |                     |                     |
| Males                     | -0.25 (-0.54, 0.03) | -0.17 (-0.52, 0.19)  | 0.08 (-0.12, 0.27)  | 0.11 (-0.15, 0.36)  |
| Females                   | -0.05 (-0.26, 0.17) | -0.26 (-0.50, -0.02) | -0.09 (-0.23, 0.06) | -0.18 (-0.39, 0.02) |
| EMM p-value <sup>a</sup>  | 0.25                | 0.66                 | 0.19                | 0.08                |
| Spine BMC                 |                     |                      |                     |                     |
| Males                     | -0.21 (-0.45, 0.04) | -0.05 (-0.42, 0.32)  | 0.01 (-0.16, 0.19)  | -0.03 (-0.25, 0.20) |
| Females                   | 0.01 (-0.20, 0.22)  | -0.12 (-0.32, 0.08)  | -0.04 (-0.16, 0.09) | -0.06 (-0.23, 0.12) |
| EMM p-value <sup>a</sup>  | 0.19                | 0.73                 | 0.64                | 0.83                |
| Whole-body less head aBMD |                     |                      |                     |                     |
| Males                     | -0.12 (-0.37, 0.14) | -0.11 (-0.46, 0.24)  | 0.05 (-0.11, 0.21)  | 0.03 (-0.18, 0.24)  |
| Females                   | 0.00 (-0.21, 0.21)  | -0.06 (-0.29, 0.16)  | -0.01 (-0.14, 0.12) | 0.01 (-0.17, 0.18)  |
| EMM p-value <sup>a</sup>  | 0.48                | 0.83                 | 0.54                | 0.88                |
| Total hip aBMD            |                     |                      |                     |                     |
| Males                     | -0.17 (-0.47, 0.13) | 0.00 (-0.49, 0.49)   | 0.08 (-0.12, 0.28)  | 0.07 (-0.22, 0.35)  |
| Females                   | -0.09 (-0.32, 0.13) | -0.07 (-0.33, 0.19)  | -0.10 (-0.27, 0.07) | -0.07 (-0.27, 0.13) |
| EMM p-value <sup>a</sup>  | 0.67                | 0.8                  | 0.18                | 0.44                |
| Femoral neck aBMD         |                     |                      |                     |                     |

|                          |                      |                     |                     |                     |
|--------------------------|----------------------|---------------------|---------------------|---------------------|
| Males                    | -0.17 (-0.49, 0.14)  | 0.08 (-0.42, 0.58)  | 0.05 (-0.15, 0.26)  | 0.07 (-0.23, 0.38)  |
| Females                  | 0.11 (-0.14, 0.36)   | 0.17 (-0.08, 0.42)  | 0.02 (-0.15, 0.19)  | 0.01 (-0.21, 0.23)  |
| EMM p-value <sup>a</sup> | 0.17                 | 0.74                | 0.81                | 0.72                |
| Forearm aBMD             |                      |                     |                     |                     |
| Males                    | -0.20 (-0.43, 0.03)  | 0.02 (-0.32, 0.37)  | -0.09 (-0.28, 0.10) | 0.01 (-0.22, 0.25)  |
| Females                  | -0.08 (-0.31, 0.15)  | -0.17 (-0.42, 0.09) | -0.10 (-0.21, 0.01) | -0.12 (-0.31, 0.07) |
| EMM p-value <sup>a</sup> | 0.47                 | 0.39                | 0.94                | 0.38                |
| Ultradistal forearm aBMD |                      |                     |                     |                     |
| Males                    | -0.14 (-0.41, 0.14)  | 0.22 (-0.26, 0.70)  | 0.04 (-0.15, 0.23)  | 0.08 (-0.20, 0.37)  |
| Females                  | 0.17 (-0.15, 0.49)   | 0.02 (-0.30, 0.33)  | -0.04 (-0.25, 0.17) | -0.12 (-0.42, 0.17) |
| EMM p-value <sup>a</sup> | 0.16                 | 0.48                | 0.58                | 0.32                |
| Spine BMAD               |                      |                     |                     |                     |
| Males                    | -0.31 (-0.58, -0.03) | 0.02 (-0.34, 0.37)  | -0.09 (-0.29, 0.12) | -0.05 (-0.30, 0.20) |
| Females                  | 0.07 (-0.16, 0.30)   | -0.06 (-0.31, 0.19) | -0.14 (-0.31, 0.02) | -0.02 (-0.22, 0.18) |
| EMM p-value <sup>a</sup> | 0.04                 | 0.72                | 0.68                | 0.86                |

Note: Difference (95% confidence interval) in bone outcome Z-score per log<sub>2</sub> unit increase in perfluoroalkyl substance concentration estimated in separate linear regression models adjusted for maternal age at delivery, mid-pregnancy BMI, race/ethnicity, household income, parity, prenatal vitamin use, average blood lead concentration, and child age at follow-up. Missing covariate information accounted for using full-information maximum likelihood. BMC, bone mineral content; aBMD, areal bone mineral density; BMAD, bone mineral apparent density; EMM, effect measure modification; PFOA, perfluorooctanoic acid; PFNA, perfluorononanoic acid; PFHxS, perfluorohexane sulfonic acid; PFOS, perfluorooctane sulfonic acid.

<sup>a</sup> p-value for EMM by child sex calculated with a two-sample z-test.

Table S5. Unadjusted associations of maternal serum perfluoroalkyl substances concentrations with bone outcome Z-scores at age 12 years, overall and by child sex ( $n = 206$ ): The HOME Study

| Outcome                   | PFOA                 | PFNA                 | PFHxS               | PFOS                |
|---------------------------|----------------------|----------------------|---------------------|---------------------|
| Whole-body less head BMC) |                      |                      |                     |                     |
| Overall                   | -0.08 (-0.23, 0.07)  | -0.11 (-0.29, 0.06)  | -0.04 (-0.15, 0.06) | -0.05 (-0.19, 0.08) |
| Males                     | -0.18 (-0.39, 0.03)  | -0.05 (-0.32, 0.23)  | 0.02 (-0.10, 0.15)  | 0.01 (-0.17, 0.19)  |
| Females                   | 0.00 (-0.21, 0.22)   | -0.14 (-0.36, 0.08)  | -0.08 (-0.21, 0.06) | -0.09 (-0.26, 0.08) |
| EMM p-value <sup>a</sup>  | 0.23                 | 0.6                  | 0.31                | 0.42                |
| Total hip BMC             |                      |                      |                     |                     |
| Overall                   | -0.16 (-0.30, -0.02) | -0.20 (-0.38, -0.02) | -0.07 (-0.17, 0.04) | -0.09 (-0.22, 0.03) |
| Males                     | -0.30 (-0.53, -0.07) | -0.20 (-0.54, 0.14)  | -0.02 (-0.20, 0.16) | -0.07 (-0.29, 0.15) |
| Females                   | -0.05 (-0.24, 0.13)  | -0.20 (-0.42, 0.01)  | -0.09 (-0.22, 0.04) | -0.10 (-0.25, 0.05) |
| EMM p-value <sup>a</sup>  | 0.1                  | 0.97                 | 0.53                | 0.82                |
| Femoral neck BMC          |                      |                      |                     |                     |
| Overall                   | -0.09 (-0.26, 0.08)  | -0.10 (-0.31, 0.11)  | -0.04 (-0.16, 0.08) | -0.05 (-0.21, 0.11) |
| Males                     | -0.21 (-0.49, 0.05)  | -0.02 (-0.37, 0.33)  | -0.01 (-0.20, 0.17) | -0.01 (-0.25, 0.23) |
| Females                   | 0.01 (-0.23, 0.24)   | -0.14 (-0.39, 0.11)  | -0.06 (-0.21, 0.10) | -0.07 (-0.27, 0.12) |
| EMM p-value <sup>a</sup>  | 0.23                 | 0.58                 | 0.73                | 0.69                |
| Forearm BMC               |                      |                      |                     |                     |
| Overall                   | -0.17 (-0.34, 0.01)  | -0.24 (-0.45, -0.04) | -0.03 (-0.14, 0.07) | -0.07 (-0.22, 0.08) |
| Males                     | -0.31 (-0.58, -0.04) | -0.12 (-0.44, 0.20)  | 0.03 (-0.16, 0.21)  | 0.07 (-0.18, 0.33)  |
| Females                   | -0.05 (-0.29, 0.19)  | -0.30 (-0.56, -0.05) | -0.07 (-0.19, 0.06) | -0.15 (-0.33, 0.03) |
| EMM p-value <sup>a</sup>  | 0.15                 | 0.39                 | 0.41                | 0.16                |
| Spine BMC                 |                      |                      |                     |                     |
| Overall                   | -0.10 (-0.26, 0.05)  | -0.12 (-0.30, 0.07)  | -0.05 (-0.15, 0.05) | -0.06 (-0.19, 0.07) |
| Males                     | -0.23 (-0.47, 0.01)  | -0.02 (-0.36, 0.31)  | -0.04 (-0.20, 0.12) | -0.05 (-0.26, 0.17) |
| Females                   | 0.00 (-0.23, 0.23)   | -0.16 (-0.37, 0.05)  | -0.06 (-0.19, 0.06) | -0.07 (-0.23, 0.10) |
| EMM p-value <sup>a</sup>  | 0.17                 | 0.48                 | 0.81                | 0.89                |
| Whole-body less head aBMD |                      |                      |                     |                     |
| Overall                   | -0.07 (-0.24, 0.09)  | -0.08 (-0.28, 0.12)  | 0.00 (-0.11, 0.11)  | 0.00 (-0.14, 0.14)  |
| Males                     | -0.17 (-0.42, 0.07)  | -0.02 (-0.34, 0.30)  | 0.01 (-0.15, 0.17)  | 0.00 (-0.22, 0.22)  |
| Females                   | 0.01 (-0.22, 0.23)   | -0.11 (-0.36, 0.14)  | -0.01 (-0.15, 0.14) | 0.00 (-0.18, 0.18)  |



|                          |                      |                     |                      |                     |
|--------------------------|----------------------|---------------------|----------------------|---------------------|
| EMM p-value <sup>a</sup> | 0.29                 | 0.66                | 0.85                 | 0.99                |
| Total hip aBMD           |                      |                     |                      |                     |
| Overall                  | -0.14 (-0.32, 0.03)  | -0.06 (-0.30, 0.17) | -0.06 (-0.19, 0.07)  | -0.04 (-0.21, 0.13) |
| Males                    | -0.24 (-0.53, 0.05)  | 0.05 (-0.40, 0.49)  | -0.01 (-0.22, 0.19)  | 0.03 (-0.26, 0.31)  |
| Females                  | -0.07 (-0.29, 0.16)  | -0.12 (-0.39, 0.15) | -0.09 (-0.25, 0.08)  | -0.07 (-0.27, 0.13) |
| EMM p-value <sup>a</sup> | 0.35                 | 0.52                | 0.57                 | 0.57                |
| Femoral neck aBMD        |                      |                     |                      |                     |
| Overall                  | -0.06 (-0.26, 0.13)  | 0.08 (-0.17, 0.33)  | -0.03 (-0.17, 0.11)  | -0.02 (-0.20, 0.17) |
| Males                    | -0.23 (-0.53, 0.08)  | 0.12 (-0.34, 0.58)  | -0.03 (-0.23, 0.18)  | 0.04 (-0.25, 0.34)  |
| Females                  | 0.07 (-0.22, 0.35)   | 0.06 (-0.21, 0.34)  | -0.03 (-0.21, 0.15)  | -0.05 (-0.27, 0.18) |
| EMM p-value <sup>a</sup> | 0.16                 | 0.83                | 1                    | 0.64                |
| Forearm aBMD             |                      |                     |                      |                     |
| Overall                  | -0.16 (-0.36, 0.00)  | -0.14 (-0.34, 0.06) | -0.09 (-0.19, 0.01)  | -0.09 (-0.22, 0.05) |
| Males                    | -0.23 (-0.44, -0.01) | 0.04 (-0.27, 0.36)  | -0.05 (-0.22, 0.11)  | 0.01 (-0.21, 0.24)  |
| Females                  | -0.11 (-0.36, 0.13)  | -0.24 (-0.50, 0.02) | -0.12 (-0.24, 0.01)  | -0.14 (-0.32, 0.04) |
| EMM p-value <sup>a</sup> | 0.49                 | 0.16                | 0.55                 | 0.29                |
| Ultradistal forearm aBMD |                      |                     |                      |                     |
| Overall                  | -0.07 (-0.34, 0.19)  | -0.01 (-0.29, 0.26) | -0.05 (-0.22, 0.13)  | -0.12 (-0.35, 0.11) |
| Males                    | -0.17 (-0.45, 0.11)  | 0.27 (-0.12, 0.66)  | 0.06 (-0.10, 0.22)   | 0.07 (-0.21, 0.34)  |
| Females                  | 0.00 (-0.42, 0.43)   | -0.16 (-0.52, 0.20) | -0.10 (-0.34, 0.13)  | -0.22 (-0.53, 0.10) |
| EMM p-value <sup>a</sup> | 0.5                  | 0.11                | 0.25                 | 0.18                |
| Spine BMAD               |                      |                     |                      |                     |
| Overall                  | -0.11 (-0.29, 0.06)  | -0.07 (-0.27, 0.14) | -0.12 (-0.24, -0.01) | -0.05 (-0.20, 0.10) |
| Males                    | -0.33 (-0.62, -0.04) | 0.00 (-0.37, 0.38)  | -0.11 (-0.29, 0.07)  | -0.07 (-0.33, 0.20) |
| Females                  | 0.06 (-0.18, 0.31)   | -0.10 (-0.34, 0.13) | -0.13 (-0.28, 0.02)  | -0.04 (-0.23, 0.14) |
| EMM p-value <sup>a</sup> | 0.04                 | 0.63                | 0.87                 | 0.88                |

Note: Difference (95% confidence interval) in outcome Z-score per log<sub>2</sub> unit increase in perfluoroalkyl substance concentration estimated in separate linear regression models. Sample size: overall, n=206; males, n=93; females, n=113. Missing covariate information accounted for using full-information maximum likelihood. aBMD, areal bone mineral density; BMAD, bone mineral apparent density; EMM, effect measure modification; PFOA, perfluorooctanoic acid; PFNA, perfluorononanoic acid; PFHxS, perfluorohexane sulfonic acid; PFOS, perfluorooctane sulfonic acid.

<sup>a</sup> p-value for EMM by child sex calculated with a two-sample z-test.

Table S6. Adjusted associations of the maternal serum perfluoroalkyl substances mixture with bone outcome Z-scores at age 12 years estimated using quantile g-computation, overall and by child sex ( $n = 206$ ): The HOME Study

| Outcome                   | Overall<br>( $n = 206$ ) |                       | Males<br>( $n = 93$ ) |                       | Females<br>( $n = 113$ ) |                       |
|---------------------------|--------------------------|-----------------------|-----------------------|-----------------------|--------------------------|-----------------------|
| Whole-body less head BMC  |                          |                       |                       |                       |                          |                       |
| $\Psi^a$                  | -0.04 (-0.18, 0.10)      |                       | 0.01 (-0.21, 0.22)    |                       | -0.04 (-0.23, 0.15)      |                       |
| Direction                 | Positive <sup>b</sup>    | Negative <sup>c</sup> | Positive <sup>b</sup> | Negative <sup>c</sup> | Positive <sup>b</sup>    | Negative <sup>c</sup> |
| Scaled effect             | 0.08                     | -0.11                 | 0.23                  | -0.22                 | 0.11                     | -0.15                 |
| PFOA weight <sup>d</sup>  |                          | 47.5                  |                       | 96.4                  | 80.1                     |                       |
| PFNA weight <sup>d</sup>  |                          | 9.7                   | 17.5                  |                       |                          | 28.9                  |
| PFHxS weight <sup>d</sup> | 100                      |                       | 82.5                  |                       | 19.9                     |                       |
| PFOS weight <sup>d</sup>  |                          | 42.8                  |                       | 3.6                   |                          | 71.1                  |
| Total hip BMC             |                          |                       |                       |                       |                          |                       |
| $\Psi^a$                  | -0.14 (-0.31, 0.02)      |                       | -0.10 (-0.36, 0.16)   |                       | -0.17 (-0.38, 0.05)      |                       |
| Direction                 | Positive <sup>b</sup>    | Negative <sup>c</sup> | Positive <sup>b</sup> | Negative <sup>c</sup> | Positive <sup>b</sup>    | Negative <sup>c</sup> |
| Scaled effect             | 0.01                     | -0.15                 | 0.18                  | -0.28                 | 0.03                     | -0.20                 |
| PFOA weight <sup>d</sup>  | 63.4                     |                       | 93.5                  |                       | 100                      |                       |
| PFNA weight <sup>d</sup>  | 26.8                     |                       | 0.7                   |                       |                          | 20.1                  |
| PFHxS weight <sup>d</sup> |                          | 100                   |                       | 100                   |                          | 34.3                  |
| PFOS weight <sup>d</sup>  | 9.8                      |                       | 5.8                   |                       |                          | 45.5                  |
| Femoral neck BMC          |                          |                       |                       |                       |                          |                       |
| $\Psi^a$                  | -0.02 (-0.19, 0.15)      |                       | 0.03 (-0.24, 0.29)    |                       | -0.02 (-0.25, 0.22)      |                       |
| Direction                 | Positive <sup>b</sup>    | Negative <sup>c</sup> | Positive <sup>b</sup> | Negative <sup>c</sup> | Positive <sup>b</sup>    | Negative <sup>c</sup> |
| Scaled effect             | 0.07                     | -0.09                 | 0.37                  | -0.34                 | 0.05                     | -0.07                 |
| PFOA weight <sup>d</sup>  | 76.6                     |                       |                       | 68.4                  | 100                      |                       |
| PFNA weight <sup>d</sup>  |                          | 16.1                  | 36.3                  |                       |                          | 44.6                  |
| PFHxS weight <sup>d</sup> | 19.9                     |                       | 63.7                  |                       |                          | 1.6                   |
| PFOS weight <sup>d</sup>  |                          | 71.1                  |                       | 31.6                  |                          | 53.4                  |
| Forearm BMC               |                          |                       |                       |                       |                          |                       |
| $\Psi^a$                  | -0.18 (-0.34, -0.02)     |                       | -0.20 (-0.46, 0.07)   |                       | -0.21 (-0.44, 0.02)      |                       |
| Direction                 | Positive <sup>b</sup>    | Negative <sup>c</sup> | Positive <sup>b</sup> | Negative <sup>c</sup> | Positive <sup>b</sup>    | Negative <sup>c</sup> |
| Scaled effect             | 0.05                     | -0.23                 | 0.23                  | -0.43                 | 0.16                     | -0.37                 |
| PFOA weight <sup>d</sup>  |                          | 23.4                  |                       | 51.8                  | 87.4                     |                       |
| PFNA weight <sup>d</sup>  |                          | 55.4                  |                       | 48.2                  |                          | 38.6                  |
| PFHxS weight <sup>d</sup> | 100                      |                       | 12.1                  |                       | 12.6                     |                       |
| PFOS weight <sup>d</sup>  |                          | 21.2                  | 87.9                  |                       |                          | 61.4                  |
| Spine BMC                 |                          |                       |                       |                       |                          |                       |
| $\Psi^a$                  | -0.07 (-0.23, 0.08)      |                       | -0.11 (-0.38, 0.16)   |                       | -0.01 (-0.24, 0.21)      |                       |
| Direction                 | Positive <sup>b</sup>    | Negative <sup>c</sup> | Positive <sup>b</sup> | Negative <sup>c</sup> | Positive <sup>b</sup>    | Negative <sup>c</sup> |
| Scaled effect             | 0                        | -0.07                 | 0.11                  | -0.22                 | 0.12                     | -0.14                 |
| PFOA weight <sup>d</sup>  |                          | 44.9                  |                       | 100                   | 100                      |                       |
| PFNA weight <sup>d</sup>  |                          | 13.6                  | 45.2                  |                       |                          | 33.9                  |

|                           |  |                       |                       |                       |                       |                                             |
|---------------------------|--|-----------------------|-----------------------|-----------------------|-----------------------|---------------------------------------------|
| PFHxS weight <sup>d</sup> |  | 17.6                  | 52.0                  |                       | 16.9                  |                                             |
| PFOS weight <sup>d</sup>  |  | 23.9                  | 2.8                   |                       | 49.1                  |                                             |
| Whole-body less head aBMD |  |                       |                       |                       |                       |                                             |
| $\psi^a$                  |  | -0.06 (-0.21, 0.10)   |                       | -0.03 (-0.28, 0.22)   |                       | -0.02 (-0.25, 0.21)                         |
| Direction                 |  | Positive <sup>b</sup> | Negative <sup>c</sup> | Positive <sup>b</sup> | Negative <sup>c</sup> | Positive <sup>b</sup> Negative <sup>c</sup> |
| Scaled effect             |  | 0.05                  | -0.11                 | 0.13                  | -0.16                 | 0.04 -0.06                                  |
| PFOA weight <sup>d</sup>  |  |                       | 59.3                  |                       | 98.4                  | 61.1                                        |
| PFNA weight <sup>d</sup>  |  |                       | 25.4                  |                       | 0.8                   | 55.6                                        |
| PFHxS weight <sup>d</sup> |  | 100                   |                       | 100                   |                       | 38.9                                        |
| PFOS weight <sup>d</sup>  |  |                       | 15.4                  |                       | 0.8                   | 44.4                                        |
| Total hip aBMD            |  |                       |                       |                       |                       |                                             |
| $\psi^a$                  |  | -0.05 (-0.24, 0.14)   |                       | 0.04 (-0.28, 0.36)    |                       | -0.08 (-0.35, 0.20)                         |
| Direction                 |  | Positive <sup>b</sup> | Negative <sup>c</sup> | Positive <sup>b</sup> | Negative <sup>c</sup> | Positive <sup>b</sup> Negative <sup>c</sup> |
| Scaled effect             |  | 0.06                  | -0.12                 | 0.36                  | -0.32                 | 0.03 -0.11                                  |
| PFOA weight <sup>d</sup>  |  |                       | 100                   |                       | 82.3                  | 11.4                                        |
| PFNA weight <sup>d</sup>  |  | 75.2                  |                       | 39.9                  |                       | 100                                         |
| PFHxS weight <sup>d</sup> |  | 20.0                  |                       | 60.1                  |                       | 62.5                                        |
| PFOS weight <sup>d</sup>  |  | 4.8                   |                       |                       | 17.7                  | 26.1                                        |
| Femoral neck aBMD         |  |                       |                       |                       |                       |                                             |
| $\psi^a$                  |  | 0.11 (-0.09, 0.30)    |                       | 0.05 (-0.28, 0.38)    |                       | 0.17 (-0.09, 0.42)                          |
| Direction                 |  | Positive <sup>b</sup> | Negative <sup>c</sup> | Positive <sup>b</sup> | Negative <sup>c</sup> | Positive <sup>b</sup> Negative <sup>c</sup> |
| Scaled effect             |  | 0.19                  | -0.08                 | 0.33                  | -0.28                 | 0.24 -0.07                                  |
| PFOA weight <sup>d</sup>  |  |                       | 64.1                  |                       | 83.3                  | 34.4                                        |
| PFNA weight <sup>d</sup>  |  | 57.5                  |                       | 42.1                  |                       | 47.4                                        |
| PFHxS weight <sup>d</sup> |  | 42.5                  |                       | 57.9                  |                       | 18.1                                        |
| PFOS weight <sup>d</sup>  |  |                       | 35.9                  |                       | 16.7                  | 100                                         |
| Forearm aBMD              |  |                       |                       |                       |                       |                                             |
| $\psi^a$                  |  | -0.15 (-0.31, 0.00)   |                       | -0.09 (-0.36, 0.18)   |                       | -0.22 (-0.44, -0.01)                        |
| Direction                 |  | Positive <sup>b</sup> | Negative <sup>c</sup> | Positive <sup>b</sup> | Negative <sup>c</sup> | Positive <sup>b</sup> Negative <sup>c</sup> |
| Scaled effect             |  | 0.00                  | -0.15                 | 0.05                  | -0.14                 | 0 -0.22                                     |
| PFOA weight <sup>d</sup>  |  |                       | 44.6                  |                       | 47.3                  | 14.7                                        |
| PFNA weight <sup>d</sup>  |  | 100                   |                       |                       | 15.2                  | 7.3                                         |
| PFHxS weight <sup>d</sup> |  |                       | 5.9                   |                       | 37.6                  | 8.3                                         |
| PFOS weight <sup>d</sup>  |  |                       | 49.4                  | 100                   |                       | 69.7                                        |
| Ultradistal forearm aBMD  |  |                       |                       |                       |                       |                                             |
| $\psi^a$                  |  | 0.05 (-0.15, 0.24)    |                       | 0.09 (-0.20, 0.38)    |                       | 0.01 (-0.29, 0.31)                          |
| Direction                 |  | Positive <sup>b</sup> | Negative <sup>c</sup> | Positive <sup>b</sup> | Negative <sup>c</sup> | Positive <sup>b</sup> Negative <sup>c</sup> |
| Scaled effect             |  | 0.3                   | -0.25                 | 0.4                   | -0.31                 | 0.37 -0.36                                  |
| PFOA weight <sup>d</sup>  |  |                       | 6.3                   |                       | 71.9                  | 48.9                                        |
| PFNA weight <sup>d</sup>  |  | 44.6                  |                       | 48.0                  |                       | 14.8                                        |
| PFHxS weight <sup>d</sup> |  | 55.4                  |                       | 52.0                  |                       | 36.4                                        |
| PFOS weight <sup>d</sup>  |  |                       | 93.7                  |                       | 28.1                  | 100                                         |
| Spine BMAD                |  |                       |                       |                       |                       |                                             |

| $\psi^a$                  | -0.10 (-0.29, 0.08)   |                       | -0.16 (-0.47, 0.15)   |                       | -0.05 (-0.31, 0.22)   |                       |
|---------------------------|-----------------------|-----------------------|-----------------------|-----------------------|-----------------------|-----------------------|
| Direction                 | Positive <sup>b</sup> | Negative <sup>c</sup> | Positive <sup>b</sup> | Negative <sup>c</sup> | Positive <sup>b</sup> | Negative <sup>c</sup> |
| Scaled effect             | 0.04                  | -0.14                 | 0.12                  | -0.27                 | 0.12                  | -0.17                 |
| PFOA weight <sup>d</sup>  |                       | 21.1                  |                       | 82.9                  | 100                   |                       |
| PFNA weight <sup>d</sup>  | 5.8                   |                       | 82.2                  |                       |                       | 24.0                  |
| PFHxS weight <sup>d</sup> |                       | 78.9                  |                       | 17.1                  |                       | 63.4                  |
| PFOS weight <sup>d</sup>  | 94.2                  |                       | 17.8                  |                       |                       | 12.6                  |

Note: Difference (95% confidence interval) in bone outcome Z-score per quartile increase in all perfluoroalkyl substances, directional scaled effects, and weights estimated using quantile g-computation. Adjusted for maternal age at delivery, mid-pregnancy BMI, race/ethnicity, household income, parity, prenatal vitamin use, average blood lead concentration, and child age at follow-up. Models for the overall population are additionally adjusted for child sex and child sex \* child age at follow-up. Missing covariate information accounted for using single stochastic imputation by chained equations. BMC, bone mineral content; aBMD, areal bone mineral density; BMAD, bone mineral apparent density; PFOA, perfluorooctanoic acid; PFNA, perfluorononanoic acid; PFHxS, perfluorohexane sulfonic acid; PFOS, perfluorooctane sulfonic acid.

<sup>a</sup> Difference (95% confidence interval) in outcome Z-score per quartile increase in all perfluoroalkyl substances

<sup>b</sup> Difference in bone outcome Z-score per quartile increase in perfluoroalkyl substances with estimated effects in the positive direction

<sup>c</sup> Difference in bone outcome Z-score per quartile increase in perfluoroalkyl substances with estimated effects in the negative direction

<sup>d</sup> Weight for the percent contribution of each PFAS to the overall mixture effect ( $\psi$ )

Table S7. Adjusted differences (95% credible intervals) in bone outcome Z-scores at age 12 years for percentiles of the maternal serum perfluoroalkyl substances mixture compared to the 50<sup>th</sup> percentile estimated using Bayesian kernel machine regression, overall and by child sex (*n* = 206): The HOME Study

| Outcome                   | Overall<br>( <i>n</i> = 206) | Males<br>( <i>n</i> = 93) | Females<br>( <i>n</i> = 113) |
|---------------------------|------------------------------|---------------------------|------------------------------|
| Whole-body less head BMC  |                              |                           |                              |
| 10 <sup>th</sup>          | 0.05 (-0.12, 0.22)           | -0.07 (-0.33, 0.20)       | 0.16 (-0.13, 0.45)           |
| 25 <sup>th</sup>          | 0.03 (-0.06, 0.12)           | 0.01 (-0.14, 0.16)        | 0.05 (-0.09, 0.19)           |
| 50 <sup>th</sup>          | Ref                          | Ref                       | Ref                          |
| 75 <sup>th</sup>          | -0.02 (-0.13, 0.08)          | 0.01 (-0.18, 0.20)        | -0.02 (-0.17, 0.16)          |
| 90 <sup>th</sup>          | -0.05 (-0.27, 0.17)          | -0.14 (-0.52, 0.24)       | 0.03 (-0.28, 0.34)           |
| Total hip BMC             |                              |                           |                              |
| 10 <sup>th</sup>          | 0.19 (-0.12, 0.51)           | 0.09 (-0.26, 0.44)        | 0.24 (-0.09, 0.57)           |
| 25 <sup>th</sup>          | 0.10 (-0.07, 0.27)           | 0.10 (-0.09, 0.30)        | 0.10 (-0.06, 0.27)           |
| 50 <sup>th</sup>          | Ref                          | Ref                       | Ref                          |
| 75 <sup>th</sup>          | -0.07 (-0.24, 0.10)          | -0.04 (-0.27, 0.20)       | -0.09 (-0.27, 0.10)          |
| 90 <sup>th</sup>          | -0.16 (-0.51, 0.18)          | -0.22 (-0.69, 0.26)       | -0.13 (-0.47, 0.22)          |
| Femoral neck BMC          |                              |                           |                              |
| 10 <sup>th</sup>          | 0.01 (-0.24, 0.25)           | -0.24 (-0.62, 0.14)       | 0.13 (-0.22, 0.48)           |
| 25 <sup>th</sup>          | 0.00 (-0.13, 0.14)           | -0.02 (-0.23, 0.18)       | 0.02 (-0.15, 0.20)           |
| 50 <sup>th</sup>          | Ref                          | Ref                       | Ref                          |
| 75 <sup>th</sup>          | -0.01 (-0.14, 0.13)          | -0.09 (-0.34, 0.16)       | 0.03 (-0.16, 0.23)           |
| 90 <sup>th</sup>          | -0.03 (-0.33, 0.26)          | -0.44 (-0.97, 0.08)       | 0.12 (-0.26, 0.50)           |
| Forearm BMC               |                              |                           |                              |
| 10 <sup>th</sup>          | 0.29 (0.01, 0.56)            | 0.10 (-0.25, 0.46)        | 0.42 (0.03, 0.82)            |
| 25 <sup>th</sup>          | 0.16 (0.01, 0.30)            | 0.10 (-0.10, 0.31)        | 0.14 (-0.04, 0.33)           |
| 50 <sup>th</sup>          | Ref                          | Ref                       | Ref                          |
| 75 <sup>th</sup>          | -0.12 (-0.27, 0.02)          | -0.07 (-0.31, 0.16)       | -0.15 (-0.36, 0.05)          |
| 90 <sup>th</sup>          | -0.18 (-0.49, 0.13)          | -0.26 (-0.74, 0.22)       | -0.19 (-0.59, 0.20)          |
| Spine BMC                 |                              |                           |                              |
| 10 <sup>th</sup>          | 0.14 (-0.18, 0.45)           | 0.11 (-0.30, 0.52)        | 0.26 (-0.16, 0.68)           |
| 25 <sup>th</sup>          | 0.07 (-0.10, 0.24)           | 0.11 (-0.14, 0.36)        | 0.04 (-0.16, 0.23)           |
| 50 <sup>th</sup>          | Ref                          | Ref                       | Ref                          |
| 75 <sup>th</sup>          | -0.01 (-0.18, 0.16)          | -0.07 (-0.31, 0.16)       | 0.09 (-0.13, 0.30)           |
| 90 <sup>th</sup>          | 0.06 (-0.28, 0.41)           | -0.26 (-0.75, 0.24)       | 0.26 (-0.14, 0.66)           |
| Whole-body less head aBMD |                              |                           |                              |
| 10 <sup>th</sup>          | 0.10 (-0.14, 0.33)           | -0.09 (-0.41, 0.24)       | 0.28 (-0.12, 0.68)           |
| 25 <sup>th</sup>          | 0.05 (-0.08, 0.18)           | 0.01 (-0.18, 0.19)        | 0.06 (-0.12, 0.25)           |
| 50 <sup>th</sup>          | Ref                          | Ref                       | Ref                          |
| 75 <sup>th</sup>          | -0.04 (-0.17, 0.10)          | -0.07 (-0.29, 0.15)       | 0.01 (-0.20, 0.22)           |
| 90 <sup>th</sup>          | -0.05 (-0.34, 0.23)          | -0.31 (-0.77, 0.15)       | 0.16 (-0.23, 0.56)           |
| Total hip aBMD            |                              |                           |                              |
| 10 <sup>th</sup>          | 0.05 (-0.20, 0.31)           | -0.11 (-0.57, 0.35)       | 0.32 (-0.13, 0.77)           |
| 25 <sup>th</sup>          | 0.03 (-0.11, 0.18)           | 0.00 (-0.27, 0.26)        | 0.11 (-0.10, 0.32)           |

|                                 |                     |                      |                     |
|---------------------------------|---------------------|----------------------|---------------------|
| 50 <sup>th</sup>                | Ref                 | Ref                  | Ref                 |
| 75 <sup>th</sup>                | -0.03 (-0.18, 0.12) | -0.03 (-0.31, 0.26)  | 0.02 (-0.22, 0.26)  |
| 90 <sup>th</sup>                | -0.05 (-0.37, 0.27) | -0.25 (-0.85, 0.35)  | 0.16 (-0.30, 0.61)  |
| <b>Femoral neck aBMD</b>        |                     |                      |                     |
| 10 <sup>th</sup>                | -0.07 (-0.37, 0.24) | -0.19 (-0.67, 0.28)  | 0.11 (-0.33, 0.54)  |
| 25 <sup>th</sup>                | -0.05 (-0.22, 0.11) | -0.04 (-0.31, 0.23)  | 0.00 (-0.21, 0.20)  |
| 50 <sup>th</sup>                | Ref                 | Ref                  | Ref                 |
| 75 <sup>th</sup>                | 0.11 (-0.05, 0.27)  | -0.03 (-0.33, 0.26)  | 0.25 (0.02, 0.48)   |
| 90 <sup>th</sup>                | 0.22 (-0.13, 0.57)  | -0.32 (-0.93, 0.30)  | 0.56 (0.13, 0.99)   |
| <b>Forearm aBMD</b>             |                     |                      |                     |
| 10 <sup>th</sup>                | 0.20 (-0.03, 0.43)  | 0.07 (-0.23, 0.38)   | 0.34 (-0.06, 0.74)  |
| 25 <sup>th</sup>                | 0.12 (-0.01, 0.25)  | 0.04 (-0.14, 0.22)   | 0.14 (-0.05, 0.33)  |
| 50 <sup>th</sup>                | Ref                 | Ref                  | Ref                 |
| 75 <sup>th</sup>                | -0.10 (-0.23, 0.03) | -0.05 (-0.25, 0.16)  | -0.10 (-0.31, 0.11) |
| 90 <sup>th</sup>                | -0.16 (-0.44, 0.12) | -0.16 (-0.58, 0.26)  | -0.11 (-0.51, 0.29) |
| <b>Ultradistal forearm aBMD</b> |                     |                      |                     |
| 10 <sup>th</sup>                | 0.07 (-0.29, 0.43)  | -0.23 (-0.61, 0.14)  | 0.54 (-0.08, 1.16)  |
| 25 <sup>th</sup>                | 0.01 (-0.18, 0.20)  | -0.07 (-0.29, 0.14)  | 0.15 (-0.13, 0.44)  |
| 50 <sup>th</sup>                | Ref                 | Ref                  | Ref                 |
| 75 <sup>th</sup>                | 0.07 (-0.12, 0.26)  | -0.03 (-0.28, 0.22)  | 0.19 (-0.12, 0.50)  |
| 90 <sup>th</sup>                | 0.15 (-0.25, 0.54)  | -0.32 (-0.83, 0.19)  | 0.47 (-0.10, 1.04)  |
| <b>Spine BMAD</b>               |                     |                      |                     |
| 10 <sup>th</sup>                | 0.02 (-0.27, 0.32)  | -0.01 (-0.39, 0.37)  | 0.11 (-0.26, 0.47)  |
| 25 <sup>th</sup>                | 0.03 (-0.13, 0.19)  | 0.05 (-0.16, 0.27)   | 0.04 (-0.15, 0.22)  |
| 50 <sup>th</sup>                | Ref                 | Ref                  | Ref                 |
| 75 <sup>th</sup>                | -0.09 (-0.24, 0.07) | -0.15 (-0.40, 0.10)  | -0.01 (-0.23, 0.20) |
| 90 <sup>th</sup>                | -0.18 (-0.52, 0.16) | -0.57 (-1.10, -0.04) | -0.02 (-0.42, 0.38) |

Note: Differences (95% credible intervals) in bone outcome Z-scores estimated using Bayesian kernel machine regression. Adjusted for maternal age at delivery, mid-pregnancy BMI, race/ethnicity, household income, parity, prenatal vitamin use, average blood lead concentration, and child age at follow-up. Models for the overall population are additionally adjusted for child sex and child sex \* child age at follow-up. Missing covariate information accounted for using single stochastic imputation by chained equations. BMC, bone mineral content; aBMD, areal bone mineral density; BMAD, bone mineral apparent density.

Table S8. Posterior inclusion probabilities estimated in Bayesian kernel machine regression models of adjusted associations of maternal serum perfluoroalkyl substances concentrations with bone outcome Z-scores at age 12 years, overall and by child sex ( $n = 206$ ): The HOME Study

| Outcome                   | Overall |      |       |      | Males |      |       |      | Females |      |       |      |
|---------------------------|---------|------|-------|------|-------|------|-------|------|---------|------|-------|------|
|                           | PFOA    | PFNA | PFHxS | PFOS | PFOA  | PFNA | PFHxS | PFOS | PFOA    | PFNA | PFHxS | PFOS |
| BMC Z-score               |         |      |       |      |       |      |       |      |         |      |       |      |
| Whole-body less head      | 0.29    | 0.29 | 0.28  | 0.27 | 0.57  | 0.39 | 0.51  | 0.44 | 0.39    | 0.37 | 0.36  | 0.39 |
| Total hip                 | 0.57    | 0.45 | 0.40  | 0.37 | 0.64  | 0.46 | 0.50  | 0.42 | 0.37    | 0.40 | 0.45  | 0.43 |
| Femoral neck              | 0.36    | 0.34 | 0.38  | 0.34 | 0.60  | 0.46 | 0.61  | 0.47 | 0.33    | 0.34 | 0.34  | 0.32 |
| Forearm                   | 0.54    | 0.66 | 0.37  | 0.41 | 0.78  | 0.49 | 0.51  | 0.62 | 0.41    | 0.60 | 0.40  | 0.55 |
| Spine                     | 0.45    | 0.44 | 0.41  | 0.43 | 0.62  | 0.42 | 0.44  | 0.41 | 0.52    | 0.47 | 0.41  | 0.44 |
| BMD Z-score               |         |      |       |      |       |      |       |      |         |      |       |      |
| Whole-body less head aBMD | 0.38    | 0.40 | 0.34  | 0.34 | 0.43  | 0.38 | 0.43  | 0.39 | 0.45    | 0.45 | 0.42  | 0.44 |
| Total hip aBMD            | 0.38    | 0.29 | 0.34  | 0.29 | 0.52  | 0.43 | 0.48  | 0.46 | 0.45    | 0.46 | 0.45  | 0.43 |
| Femoral neck aBMD         | 0.38    | 0.47 | 0.41  | 0.40 | 0.54  | 0.46 | 0.53  | 0.48 | 0.54    | 0.64 | 0.49  | 0.50 |
| Forearm aBMD              | 0.54    | 0.37 | 0.37  | 0.36 | 0.54  | 0.41 | 0.43  | 0.42 | 0.45    | 0.46 | 0.45  | 0.46 |
| Ultradistal forearm aBMD  | 0.41    | 0.42 | 0.41  | 0.45 | 0.59  | 0.55 | 0.47  | 0.49 | 0.69    | 0.58 | 0.48  | 0.66 |
| Spine BMAD                | 0.33    | 0.30 | 0.50  | 0.33 | 0.82  | 0.45 | 0.47  | 0.44 | 0.42    | 0.33 | 0.51  | 0.36 |

Note: Posterior inclusion probabilities estimated using Bayesian kernel machine regression. Adjusted for maternal age at delivery, mid-pregnancy BMI, race/ethnicity, household income, parity, prenatal vitamin use, average blood lead concentration, and child age at follow-up. Models for the overall population are additionally adjusted for child sex and child sex \* child age at follow-up. Missing covariate information accounted for using single stochastic imputation by chained equations. Sample size: overall,  $n=206$ ; males,  $n=93$ ; females,  $n=113$ . BMC, bone mineral content; aBMD, areal bone mineral density; BMAD, bone mineral apparent density; PFOA, perfluorooctanoic acid; PFNA, perfluorononanoic acid; PFHxS, perfluorohexane sulfonic acid; PFOS, perfluorooctane sulfonic acid.

Table S9. Adjusted estimates of natural indirect (lean body mass index mediated) and natural direct effects of maternal serum perfluoroalkyl substances concentrations on BMD Z-scores at age 12 years, overall ( $n = 206$ ): The HOME Study

| Outcome                   | PFOA                | PFNA                | PFHxS               | PFOS                |
|---------------------------|---------------------|---------------------|---------------------|---------------------|
| Whole-body less head aBMD |                     |                     |                     |                     |
| NIE                       | -0.03 (-0.12, 0.04) | -0.05 (-0.16, 0.03) | 0.01 (-0.04, 0.07)  | -0.03 (-0.09, 0.03) |
| NDE                       | -0.05 (-0.22, 0.10) | -0.06 (-0.27, 0.13) | -0.01 (-0.12, 0.09) | 0.02 (-0.12, 0.14)  |
| Total hip aBMD            |                     |                     |                     |                     |
| NIE                       | -0.04 (-0.14, 0.05) | -0.07 (-0.19, 0.04) | 0.02 (-0.04, 0.08)  | -0.03 (-0.11, 0.04) |
| NDE                       | -0.08 (-0.26, 0.08) | 0.00 (-0.24, 0.26)  | -0.05 (-0.18, 0.09) | 0.02 (-0.15, 0.19)  |
| Femoral neck aBMD         |                     |                     |                     |                     |
| NIE                       | -0.04 (-0.14, 0.05) | -0.07 (-0.20, 0.04) | 0.02 (-0.05, 0.09)  | -0.03 (-0.11, 0.04) |
| NDE                       | 0.03 (-0.16, 0.20)  | 0.20 (-0.03, 0.44)  | 0.03 (-0.11, 0.16)  | 0.08 (-0.10, 0.26)  |
| Forearm aBMD              |                     |                     |                     |                     |
| NIE                       | -0.03 (-0.10, 0.03) | -0.05 (-0.13, 0.02) | 0.01 (-0.03, 0.05)  | -0.02 (-0.08, 0.02) |
| NDE                       | -0.14 (-0.31, 0.03) | -0.08 (-0.31, 0.12) | -0.10 (-0.03, 0.05) | -0.06 (-0.21, 0.07) |
| Ultradistal forearm aBMD  |                     |                     |                     |                     |
| NIE                       | -0.04 (-0.14, 0.06) | -0.07 (-0.21, 0.04) | 0.02 (-0.05, 0.09)  | -0.03 (-0.12, 0.04) |
| NDE                       | 0.02 (-0.22, 0.23)  | 0.11 (-0.16, 0.36)  | -0.03 (-0.20, 0.13) | -0.06 (-0.29, 0.14) |
| Spine BMAD                |                     |                     |                     |                     |
| NIE                       | -0.03 (-0.11, 0.04) | -0.06 (-0.16, 0.03) | 0.01 (-0.04, 0.07)  | -0.03 (-0.09, 0.03) |
| NDE                       | -0.05 (-0.25, 0.12) | 0.00 (-0.21, 0.20)  | -0.12 (-0.26, 0.00) | 0.01 (-0.15, 0.15)  |

Note: Difference (95% confidence interval) in outcome Z-score per log<sub>2</sub> unit increase in perfluoroalkyl substance concentration estimated in separate linear regression models adjusted for maternal age at delivery, mid-pregnancy BMI, race/ethnicity, household income, parity, prenatal vitamin use, average blood lead concentration, child sex, child age at follow-up, child sex \* child age at follow-up. Indirect and direct effects were estimated using structural equation models, maximum likelihood estimation, and bias-corrected and accelerated bootstrap confidence intervals. Missing covariate information accounted for using full-information maximum likelihood. aBMD, areal bone mineral density; BMAD, bone mineral apparent density; NIE, natural indirect effect; NDE, natural direct effect; PFOA, perfluorooctanoic acid; PFNA, perfluorononanoic acid; PFHxS, perfluorohexane sulfonic acid; PFOS, perfluorooctane sulfonic acid.



Table S10. Adjusted estimates of natural indirect (lean body mass index mediated) and natural direct effects of maternal serum perfluoroalkyl substances concentrations on BMD Z-scores at age 12 years, males ( $n = 93$ ): The HOME Study

| Outcome                   | PFOA                | PFNA                | PFHxS               | PFOS                |
|---------------------------|---------------------|---------------------|---------------------|---------------------|
| Whole-body less head aBMD |                     |                     |                     |                     |
| NIE                       | -0.08 (-0.27, 0.05) | 0.01 (-0.23, 0.21)  | 0.07 (-0.03, 0.21)  | 0.00 (-0.13, 0.14)  |
| NDE                       | -0.03 (-0.26, 0.19) | -0.12 (-0.45, 0.22) | -0.02 (-0.20, 0.14) | 0.03 (-0.20, 0.22)  |
| Total hip aBMD            |                     |                     |                     |                     |
| NIE                       | -0.10 (-0.32, 0.05) | 0.01 (-0.28, 0.25)  | 0.09 (-0.03, 0.27)  | 0.00 (-0.15, 0.17)  |
| NDE                       | -0.07 (-0.36, 0.20) | -0.01 (-0.50, 0.54) | -0.01 (-0.23, 0.21) | 0.06 (-0.27, 0.34)  |
| Femoral neck aBMD         |                     |                     |                     |                     |
| NIE                       | -0.11 (-0.34, 0.06) | 0.01 (-0.30, 0.26)  | 0.10 (-0.03, 0.28)  | 0.00 (-0.17, 0.18)  |
| NDE                       | -0.07 (-0.35, 0.18) | 0.07 (-0.38, 0.58)  | -0.04 (-0.28, 0.18) | 0.07 (-0.27, 0.36)  |
| Forearm aBMD              |                     |                     |                     |                     |
| NIE                       | -0.07 (-0.24, 0.03) | 0.01 (-0.21, 0.18)  | 0.07 (-0.02, 0.19)  | 0.00 (-0.11, 0.12)  |
| NDE                       | -0.12 (-0.35, 0.09) | 0.02 (-0.34, 0.37)  | -0.16 (-0.36, 0.02) | 0.01 (-0.23, 0.25)  |
| Ultradistal forearm aBMD  |                     |                     |                     |                     |
| NIE                       | -0.09 (-0.27, 0.05) | 0.01 (-0.23, 0.22)  | 0.08 (-0.03, 0.23)  | -0.09 (-0.27, 0.05) |
| NDE                       | -0.05 (-0.30, 0.21) | 0.21 (-0.21, 0.22)  | -0.04 (-0.25, 0.16) | -0.05 (-0.30, 0.21) |
| Spine BMAD                |                     |                     |                     |                     |
| NIE                       | -0.07 (-0.23, 0.03) | 0.01 (-0.19, 0.17)  | 0.06 (-0.02, 0.20)  | 0.00 (-0.11, 0.12)  |
| NDE                       | -0.24 (-0.54, 0.05) | 0.01 (-0.35, 0.37)  | -0.15 (-0.36, 0.06) | -0.05 (-0.31, 0.22) |

Note: Difference (95% confidence interval) in outcome Z-score per log<sub>2</sub> unit increase in perfluoroalkyl substance concentration estimated in separate linear regression models adjusted for maternal age at delivery, mid-pregnancy BMI, race/ethnicity, household income, parity, prenatal vitamin use, average blood lead concentration, and child age at follow-up. Indirect and direct effects were estimated using structural equation models, maximum likelihood estimation, and bias-corrected and accelerated bootstrap confidence intervals. Missing covariate information accounted for using full-information maximum likelihood. aBMD, areal bone mineral density; BMAD, bone mineral apparent density; NIE, natural indirect effect; NDE, natural direct effect; PFOA, perfluorooctanoic acid; PFNA, perfluorononanoic acid; PFHxS, perfluorohexane sulfonic acid; PFOS, perfluorooctane sulfonic acid.

Table S11. Adjusted estimates of natural indirect (lean body mass index mediated) and natural direct effects of maternal serum perfluoroalkyl substances concentrations on BMD Z-scores at age 12 years, females ( $n = 113$ ): The HOME Study

| Outcome                   | PFOA                | PFNA                | PFHxS               | PFOS                |
|---------------------------|---------------------|---------------------|---------------------|---------------------|
| Whole-body less head aBMD |                     |                     |                     |                     |
| NIE                       | -0.01 (-0.12, 0.08) | -0.07 (-0.22, 0.00) | -0.02 (-0.08, 0.02) | -0.05 (-0.15, 0.01) |
| NDE                       | 0.01 (-0.26, 0.23)  | 0.00 (-0.27, 0.27)  | 0.00 (-0.15, 0.15)  | 0.05 (-0.17, 0.23)  |
| Total hip aBMD            |                     |                     |                     |                     |
| NIE                       | -0.01 (-0.13, 0.11) | -0.10 (-0.25, 0.00) | -0.02 (-0.10, 0.03) | -0.06 (-0.18, 0.01) |
| NDE                       | -0.09 (-0.37, 0.16) | -0.02 (-0.27, 0.33) | -0.08 (-0.27, 0.10) | -0.02 (-0.26, 0.19) |
| Femoral neck aBMD         |                     |                     |                     |                     |
| NIE                       | -0.01 (-0.13, 0.11) | -0.10 (-0.26, 0.00) | -0.02 (-0.09, 0.04) | -0.06 (-0.17, 0.02) |
| NDE                       | 0.11 (-0.17, 0.37)  | 0.27 (0.00, 0.56)   | 0.04 (-0.15, 0.23)  | 0.06 (-0.19, 0.30)  |
| Forearm aBMD              |                     |                     |                     |                     |
| NIE                       | 0.00 (-0.08, 0.05)  | -0.04 (-0.16, 0.01) | -0.01 (-0.08, 0.01) | -0.03 (-0.13, 0.00) |
| NDE                       | -0.08 (-0.35, 0.18) | -0.13 (-0.42, 0.16) | -0.10 (-0.22, 0.03) | -0.10 (-0.34, 0.09) |
| Ultradistal forearm aBMD  |                     |                     |                     |                     |
| NIE                       | -0.01 (-0.15, 0.14) | -0.12 (-0.31, 0.00) | -0.02 (-0.12, 0.05) | -0.06 (-0.20, 0.02) |
| NDE                       | 0.17 (-0.23, 0.50)  | 0.12 (-0.26, 0.46)  | -0.02 (-0.25, 0.20) | -0.07 (-0.43, 0.21) |
| Spine BMAD                |                     |                     |                     |                     |
| NIE                       | -0.01 (-0.13, 0.10) | -0.09 (-0.24, 0.00) | -0.02 (-0.09, 0.03) | -0.06 (-0.17, 0.02) |
| NDE                       | 0.08 (-0.19, 0.33)  | 0.03 (-0.26, 0.31)  | -0.12 (-0.30, 0.06) | 0.03 (-0.21, 0.22)  |

Note: Difference (95% confidence interval) in outcome Z-score per log<sub>2</sub> unit increase in perfluoroalkyl substance concentration estimated in separate linear regression models adjusted for maternal age at delivery, mid-pregnancy BMI, race/ethnicity, household income, parity, prenatal vitamin use, average blood lead concentration, and child age at follow-up. Indirect and direct effects were estimated using structural equation models, maximum likelihood estimation, and bias-corrected and accelerated bootstrap confidence intervals. Missing covariate information accounted for using full-information maximum likelihood. aBMD, areal bone mineral density; BMAD, bone mineral apparent density; NIE, natural indirect effect; NDE, natural direct effect; PFOA, perfluorooctanoic acid; PFNA, perfluorononanoic acid; PFHxS, perfluorohexane sulfonic acid; PFOS, perfluorooctane sulfonic acid.

Table S12. Adjusted estimates of empirical mean (95% credible interval) natural indirect effects and natural direct effects from Bayesian kernel machine regression causal mediation analysis models of the maternal serum perfluoroalkyl substances mixture with bone outcome Z-scores at age 12 years, overall and by child sex ( $n = 206$ ): The HOME Study

| Outcome                   | Overall<br>( $n = 206$ ) | Males<br>( $n = 93$ ) | Females<br>( $n = 113$ ) |
|---------------------------|--------------------------|-----------------------|--------------------------|
| Whole-body less head BMC  |                          |                       |                          |
| NIE                       | 0.01 (-0.20, 0.21)       | 0.01 (-0.30, 0.33)    | 0.01 (-0.27, 0.28)       |
| NDE                       | -0.03 (-0.23, 0.18)      | -0.02 (-0.35, 0.30)   | -0.02 (-0.30, 0.25)      |
| Total hip BMC             |                          |                       |                          |
| NIE                       | -0.02 (-0.27, 0.23)      | 0.00 (-0.39, 0.39)    | -0.04 (-0.36, 0.26)      |
| NDE                       | -0.07 (-0.33, 0.18)      | -0.10 (-0.50, 0.28)   | -0.07 (-0.39, 0.23)      |
| Femoral neck BMC          |                          |                       |                          |
| NIE                       | 0.00 (-0.24, 0.23)       | 0.01 (-0.38, 0.40)    | -0.01 (-0.34, 0.31)      |
| NDE                       | 0.00 (-0.23, 0.23)       | -0.05 (-0.45, 0.35)   | 0.02 (-0.29, 0.34)       |
| Forearm BMC               |                          |                       |                          |
| NIE                       | 0.01 (-0.29, 0.30)       | 0.03 (-0.36, 0.45)    | -0.03 (-0.41, 0.35)      |
| NDE                       | -0.15 (-0.44, 0.13)      | -0.14 (-0.58, 0.25)   | -0.15 (-0.53, 0.21)      |
| Spine BMC                 |                          |                       |                          |
| NIE                       | -0.01 (-0.22, 0.20)      | -0.02 (-0.36, 0.32)   | -0.02 (-0.33, 0.30)      |
| NDE                       | -0.01 (-0.22, 0.20)      | -0.07 (-0.43, 0.28)   | 0.04 (-0.27, 0.36)       |
| Whole-body less head aBMD |                          |                       |                          |
| NIE                       | -0.02 (-0.24, 0.21)      | 0.00 (-0.36, 0.35)    | -0.02 (-0.33, 0.29)      |
| NDE                       | -0.01 (-0.23, 0.21)      | -0.04 (-0.41, 0.31)   | 0.01 (-0.29, 0.31)       |
| Total hip aBMD            |                          |                       |                          |
| NIE                       | -0.02 (-0.31, 0.25)      | -0.01 (-0.45, 0.43)   | -0.02 (-0.38, 0.34)      |
| NDE                       | -0.01 (-0.29, 0.27)      | 0.00 (-0.45, 0.44)    | -0.02 (-0.38, 0.34)      |
| Femoral neck aBMD         |                          |                       |                          |
| NIE                       | -0.05 (-0.34, 0.24)      | -0.02 (-0.49, 0.44)   | -0.06 (-0.45, 0.34)      |
| NDE                       | 0.09 (-0.19, 0.39)       | 0.02 (-0.45, 0.48)    | 0.18 (-0.19, 0.59)       |
| Forearm aBMD              |                          |                       |                          |
| NIE                       | 0.03 (-0.23, 0.29)       | 0.02 (-0.33, 0.37)    | 0.02 (-0.32, 0.37)       |
| NDE                       | -0.13 (-0.40, 0.12)      | -0.08 (-0.44, 0.27)   | -0.12 (-0.48, 0.20)      |
| Ultradistal forearm aBMD  |                          |                       |                          |
| NIE                       | 0.00 (-0.28, 0.29)       | 0.01 (-0.38, 0.41)    | -0.01 (-0.48, 0.46)      |
| NDE                       | 0.00 (-0.28, 0.28)       | 0.00 (-0.40, 0.40)    | 0.06 (-0.40, 0.52)       |
| Spine BMAD                |                          |                       |                          |
| NIE                       | 0.00 (-0.26, 0.27)       | 0.04 (-0.40, 0.58)    | -0.01 (-0.39, 0.36)      |
| NDE                       | -0.05 (-0.34, 0.21)      | -0.21 (-0.77, 0.24)   | -0.02 (-0.40, 0.35)      |

Note: Empirical mean (95% credible interval) natural indirect effects and natural direct effects estimated using Bayesian kernel machine regression causal mediation analysis. Adjusted for maternal age at delivery, mid-pregnancy BMI, race/ethnicity, household income, parity, prenatal vitamin use, average blood lead concentration, and child age at follow-up. Models for the overall population are additionally adjusted for child sex and child sex \* child age at follow-up. NDEs estimate the average difference (95% credible interval) in the counterfactual outcomes for a change in exposures from the 75th percentile to the 25th percentile, fixing the mediator to the level it would have taken if the exposures were at the 25th

percentile. NIEs estimate the average difference (95% credible interval) in counterfactual outcomes when the exposures are fixed to the 75th percentile, but the mediator varies from the value it would have taken if the exposures were set to the 75th compared to the 25th percentile. Missing covariate information accounted for using single stochastic imputation by chained equations. BMC, bone mineral content; aBMD, areal bone mineral density; BMAD, bone mineral apparent density; PFOA, perfluorooctanoic acid; PFNA, perfluorononanoic acid; PFHxS, perfluorohexane sulfonic acid; PFOS, perfluorooctane sulfonic acid; TE, total effect; NDE, natural direct effect; NIE, natural indirect effect.

Table S13. Adjusted associations of maternal serum perfluoroalkyl substances concentrations with bone outcome Z-scores at 12 years of age ( $n = 206$ ): The HOME Study. Sensitivity analysis with additional adjustment for Tanner stage at age 12 years

| Outcome                   | PFOA                 | PFNA                 | PFHxS               | PFOS                |
|---------------------------|----------------------|----------------------|---------------------|---------------------|
| <b>BMC Z-score</b>        |                      |                      |                     |                     |
| Whole-body less head      | -0.08 (-0.23, 0.07)  | -0.07 (-0.23, 0.10)  | 0.00 (-0.10, 0.11)  | -0.04 (-0.17, 0.10) |
| Total hip                 | -0.19 (-0.35, -0.03) | -0.18 (-0.36, 0.01)  | -0.05 (-0.16, 0.07) | -0.09 (-0.23, 0.05) |
| Femoral neck              | -0.07 (-0.25, 0.11)  | -0.05 (-0.25, 0.15)  | 0.02 (-0.11, 0.14)  | -0.01 (-0.17, 0.15) |
| Forearm                   | -0.19 (-0.38, 0.00)  | -0.24 (-0.44, -0.05) | -0.02 (-0.14, 0.09) | -0.08 (-0.23, 0.07) |
| Spine                     | -0.12 (-0.27, 0.04)  | -0.10 (-0.29, 0.09)  | -0.03 (-0.14, 0.08) | -0.06 (-0.21, 0.08) |
| <b>BMD Z-score</b>        |                      |                      |                     |                     |
| Whole-body less head aBMD | -0.11 (-0.28, 0.06)  | -0.11 (-0.31, 0.09)  | -0.01 (-0.12, 0.10) | -0.03 (-0.17, 0.12) |
| Total hip aBMD            | -0.14 (-0.32, 0.05)  | -0.06 (-0.30, 0.18)  | -0.03 (-0.17, 0.11) | -0.02 (-0.19, 0.15) |
| Femoral neck aBMD         | -0.02 (-0.22, 0.17)  | 0.14 (-0.10, 0.37)   | 0.04 (-0.10, 0.18)  | 0.03 (-0.15, 0.22)  |
| Forearm aBMD              | -0.17 (-0.35, 0.00)  | -0.12 (-0.34, 0.09)  | -0.09 (-0.20, 0.01) | -0.09 (-0.23, 0.05) |
| Ultradistal forearm aBMD  | -0.02 (-0.24, 0.20)  | 0.04 (-0.22, 0.30)   | -0.01 (-0.16, 0.15) | -0.09 (-0.29, 0.12) |
| Spine BMAD                | -0.11 (-0.30, 0.08)  | -0.04 (-0.25, 0.17)  | -0.12 (-0.26, 0.02) | -0.03 (-0.20, 0.13) |

Note: Difference (95% confidence interval) in bone outcome Z-score per  $\log_2$  unit increase in perfluoroalkyl substance concentrations estimated in separate linear regression models adjusted for maternal age at delivery, mid-pregnancy BMI, race/ethnicity, household income, parity, prenatal vitamin use, average blood lead concentration, child sex, child age at follow-up, child sex \* child age at follow-up, and Tanner stage at follow-up. Missing covariate information accounted for using full-information maximum likelihood. BMC, bone mineral content; aBMD, areal bone mineral density; BMAD, bone mineral apparent density; PFOA, perfluorooctanoic acid; PFNA, perfluorononanoic acid; PFHxS, perfluorohexane sulfonic acid; PFOS, perfluorooctane sulfonic acid.

Table S14. Adjusted associations of maternal serum perfluoroalkyl substance concentrations with bone outcome Z-scores at 12 years of age among males ( $n = 93$ ) and females ( $n = 113$ ): The HOME Study. Sensitivity analysis with additional adjustment for Tanner stage at age 12 years

| Outcome                   | PFOA                | PFNA                 | PFHxS               | PFOS                |
|---------------------------|---------------------|----------------------|---------------------|---------------------|
| Whole-body less head BMC  |                     |                      |                     |                     |
| Males                     | -0.13 (-0.34, 0.09) | -0.02 (-0.32, 0.27)  | 0.08 (-0.06, 0.22)  | 0.06 (-0.13, 0.24)  |
| Females                   | 0.01 (-0.19, 0.21)  | -0.04 (-0.25, 0.17)  | -0.04 (-0.17, 0.09) | -0.07 (-0.27, 0.13) |
| EMM p-value <sup>a</sup>  | 0.36                | 0.91                 | 0.23                | 0.37                |
| Total hip BMC             |                     |                      |                     |                     |
| Males                     | -0.24 (-0.49, 0.01) | -0.15 (-0.52, 0.21)  | 0.04 (-0.14, 0.22)  | -0.03 (-0.27, 0.21) |
| Females                   | -0.15 (-0.35, 0.05) | -0.15 (-0.35, 0.05)  | -0.12 (-0.25, 0.01) | -0.16 (-0.32, 0.00) |
| EMM p-value <sup>a</sup>  | 0.58                | 1.00                 | 0.15                | 0.39                |
| Femoral neck BMC          |                     |                      |                     |                     |
| Males                     | -0.14 (-0.41, 0.14) | 0.02 (-0.35, 0.39)   | 0.06 (-0.14, 0.25)  | 0.03 (-0.21, 0.27)  |
| Females                   | -0.01 (-0.25, 0.23) | -0.04 (-0.28, 0.20)  | -0.02 (-0.17, 0.13) | -0.04 (-0.25, 0.17) |
| EMM p-value <sup>a</sup>  | 0.49                | 0.80                 | 0.55                | 0.67                |
| Forearm BMC               |                     |                      |                     |                     |
| Males                     | -0.25 (-0.53, 0.04) | -0.14 (-0.49, 0.20)  | 0.05 (-0.14, 0.25)  | 0.10 (-0.15, 0.36)  |
| Females                   | -0.07 (-0.29, 0.15) | -0.26 (-0.50, -0.01) | -0.08 (-0.23, 0.06) | -0.20 (-0.42, 0.01) |
| EMM p-value <sup>a</sup>  | 0.34                | 0.60                 | 0.26                | 0.07                |
| Spine BMC                 |                     |                      |                     |                     |
| Males                     | -0.21 (-0.44, 0.03) | -0.01 (-0.38, 0.36)  | -0.02 (-0.20, 0.16) | -0.03 (-0.27, 0.21) |
| Females                   | -0.03 (-0.27, 0.20) | -0.11 (-0.35, 0.12)  | -0.03 (-0.17, 0.10) | -0.08 (-0.27, 0.11) |
| EMM p-value <sup>a</sup>  | 0.30                | 0.65                 | 0.89                | 0.77                |
| Whole-body less head aBMD |                     |                      |                     |                     |
| Males                     | -0.12 (-0.36, 0.12) | -0.07 (-0.42, 0.28)  | 0.01 (-0.16, 0.19)  | 0.02 (-0.20, 0.24)  |
| Females                   | -0.02 (-0.25, 0.21) | -0.06 (-0.31, 0.19)  | -0.01 (-0.15, 0.13) | 0.00 (-0.20, 0.19)  |
| EMM p-value <sup>a</sup>  | 0.57                | 0.97                 | 0.83                | 0.87                |
| Total hip aBMD            |                     |                      |                     |                     |
| Males                     | -0.17 (-0.47, 0.13) | 0.03 (-0.47, 0.53)   | 0.05 (-0.15, 0.26)  | 0.06 (-0.24, 0.36)  |
| Females                   | -0.12 (-0.36, 0.13) | -0.07 (-0.34, 0.20)  | -0.10 (-0.28, 0.08) | -0.09 (-0.30, 0.13) |
| EMM p-value <sup>a</sup>  | 0.78                | 0.74                 | 0.27                | 0.43                |

|                          |                      |                     |                     |                     |
|--------------------------|----------------------|---------------------|---------------------|---------------------|
| Femoral neck aBMD        |                      |                     |                     |                     |
| Males                    | -0.17 (-0.49, 0.14)  | 0.11 (-0.39, 0.60)  | 0.03 (-0.19, 0.25)  | 0.07 (-0.24, 0.38)  |
| Females                  | 0.09 (-0.17, 0.34)   | 0.18 (-0.08, 0.44)  | 0.02 (-0.16, 0.21)  | -0.01 (-0.24, 0.23) |
| EMM p-value <sup>a</sup> | 0.20                 | 0.80                | 0.96                | 0.70                |
| Forearm aBMD             |                      |                     |                     |                     |
| Males                    | -0.19 (-0.42, 0.03)  | 0.05 (-0.30, 0.39)  | -0.12 (-0.31, 0.08) | 0.01 (-0.23, 0.25)  |
| Females                  | -0.10 (-0.34, 0.15)  | -0.16 (-0.43, 0.10) | -0.10 (-0.22, 0.01) | -0.13 (-0.33, 0.07) |
| EMM p-value <sup>a</sup> | 0.57                 | 0.34                | 0.89                | 0.37                |
| Ultradistal forearm aBMD |                      |                     |                     |                     |
| Males                    | -0.14 (-0.41, 0.14)  | 0.23 (-0.24, 0.70)  | 0.03 (-0.17, 0.23)  | 0.08 (-0.21, 0.38)  |
| Females                  | 0.18 (-0.14, 0.49)   | 0.02 (-0.30, 0.33)  | -0.04 (-0.24, 0.17) | -0.12 (-0.42, 0.17) |
| EMM p-value <sup>a</sup> | 0.14                 | 0.46                | 0.65                | 0.34                |
| Spine BMAD               |                      |                     |                     |                     |
| Males                    | -0.31 (-0.58, -0.04) | 0.04 (-0.32, 0.39)  | -0.11 (-0.31, 0.10) | -0.05 (-0.31, 0.20) |
| Females                  | 0.02 (-0.26, 0.29)   | -0.05 (-0.33, 0.23) | -0.14 (-0.33, 0.04) | -0.05 (-0.29, 0.19) |
| EMM p-value <sup>a</sup> | 0.10                 | 0.69                | 0.81                | 0.99                |

Note: Difference (95% confidence interval) in bone outcome Z-score per log<sub>2</sub> unit increase in perfluoroalkyl substance concentration estimated in separate linear regression models adjusted for maternal age at delivery, mid-pregnancy BMI, race/ethnicity, household income, parity, prenatal vitamin use, average blood lead concentration, and child age and Tanner stage at follow-up. Missing covariate information accounted for using full-information maximum likelihood. BMC, bone mineral content; aBMD, areal bone mineral density; BMAD, bone mineral apparent density; EMM, effect measure modification; PFOA, perfluorooctanoic acid; PFNA, perfluorononanoic acid; PFHxS, perfluorohexane sulfonic acid; PFOS, perfluorooctane sulfonic acid.

<sup>a</sup> p-value for EMM by child sex calculated with a two-sample z-test.

Figure S1. HOME Study eligibility and enrollment flowchart for study inclusion

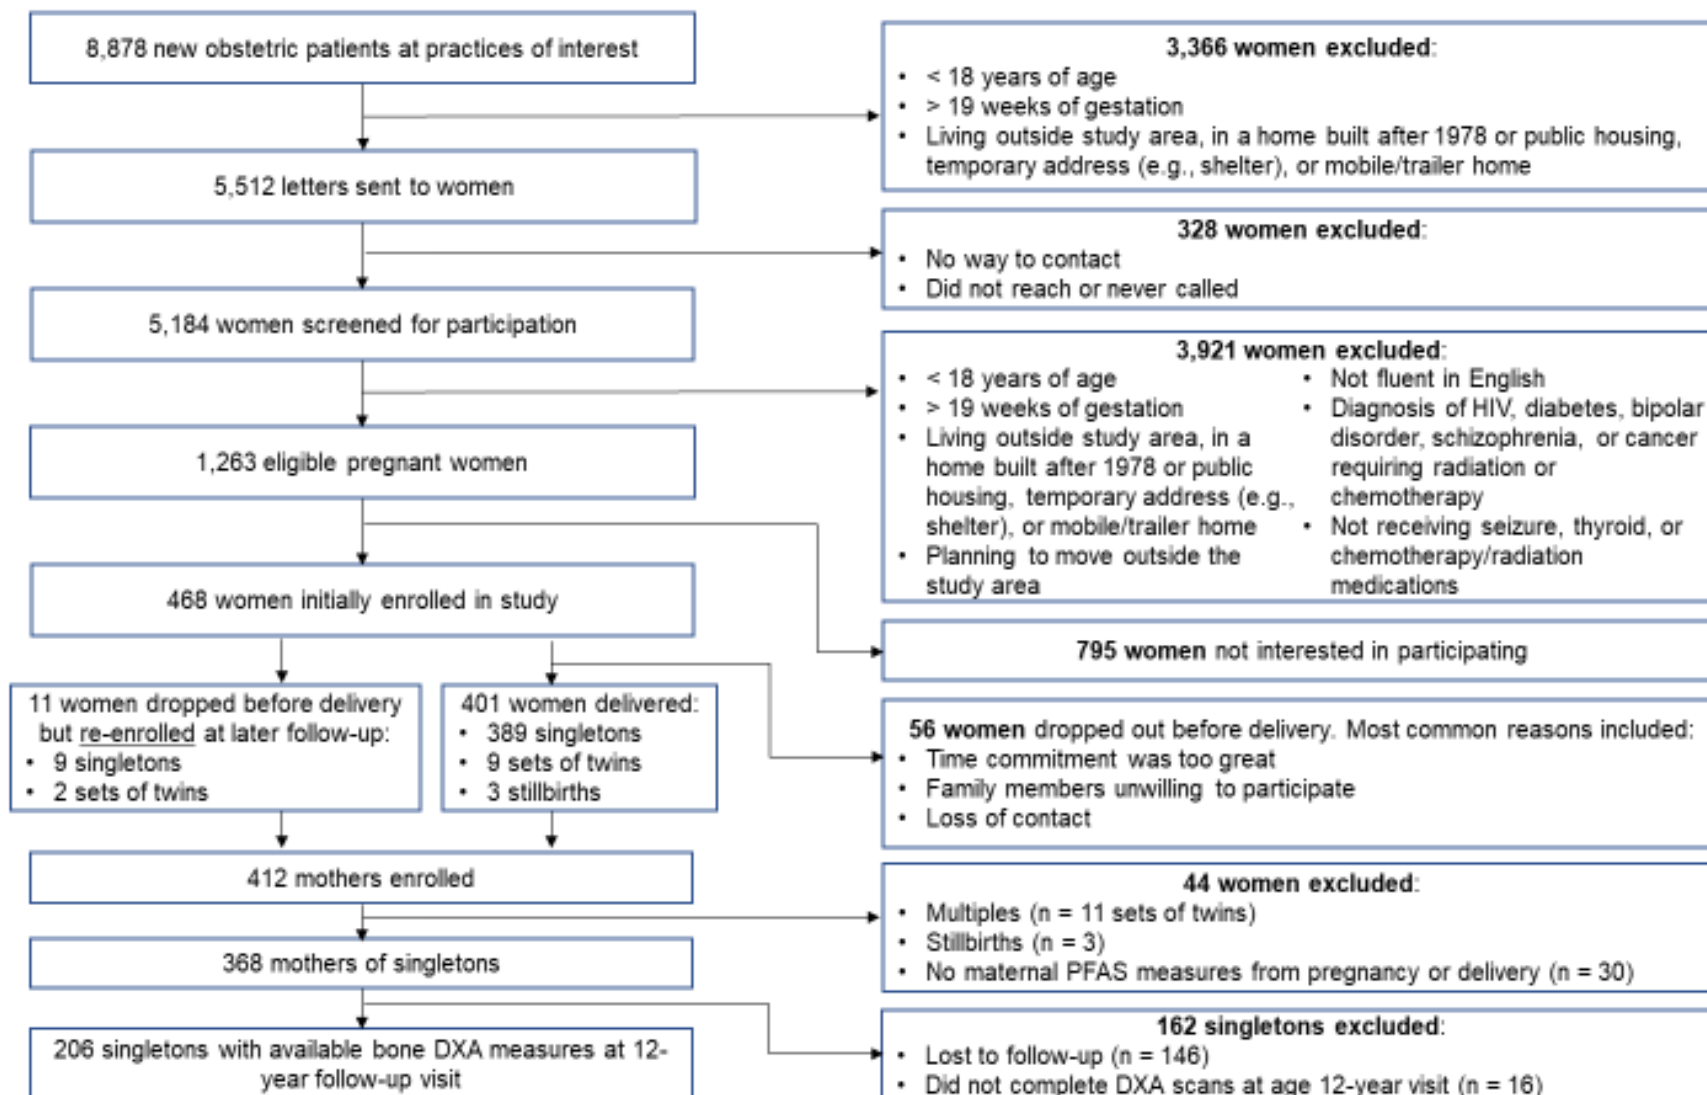



Figure S2. Directed acyclic graph for the relationship of maternal serum PFAS concentrations with child bone outcomes at age 12 years: The HOME Study.

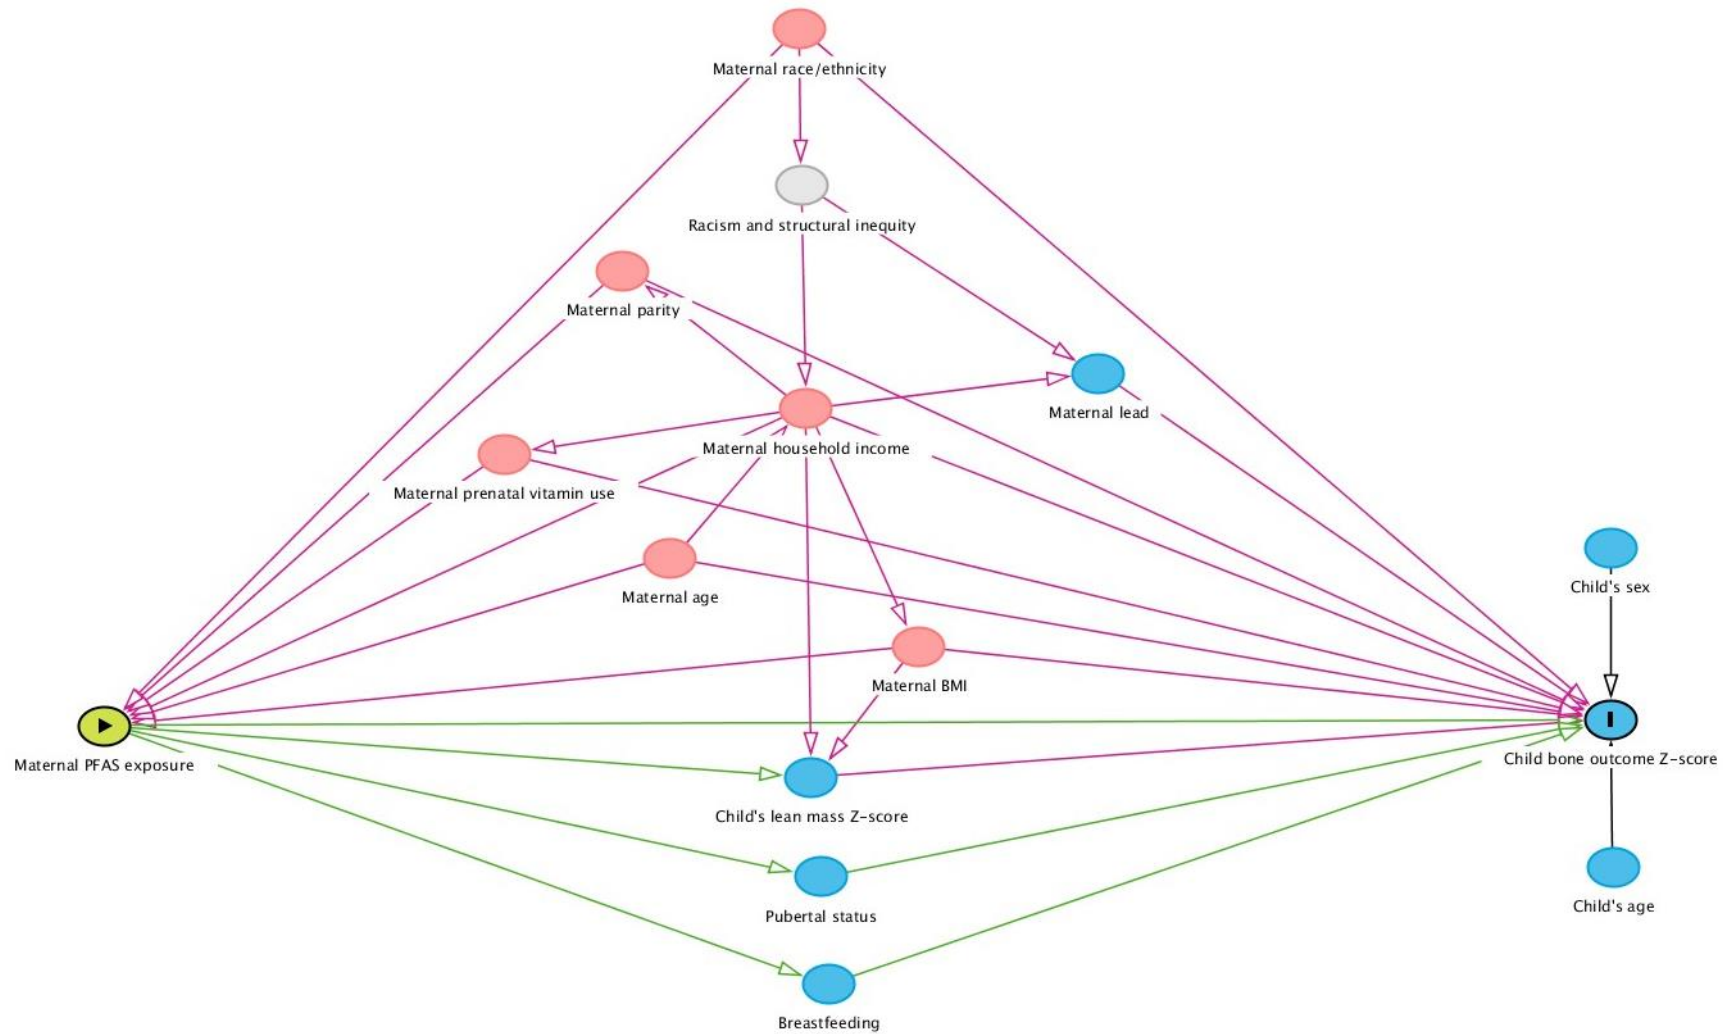

Supplement: ehp9424.s001.acco.pdf [file ehp9424.s001.acco.pdf]
